# Supplementary material
Source: ML conference proceedings conference paper supplement (https://proceedings.neurips.cc/paper_files/paper/2011/hash/a424ed4bd3a7d6aea720b86d4a360f75-Abstract.html)
Supplement: Supplementary file 1 [file a424ed4bd3a7d6aea720b86d4a360f75-Supplemental.zip]

## Supplementary Material

### A BSC<sup>s+s</sup> on $40 \times 40$ Image patches

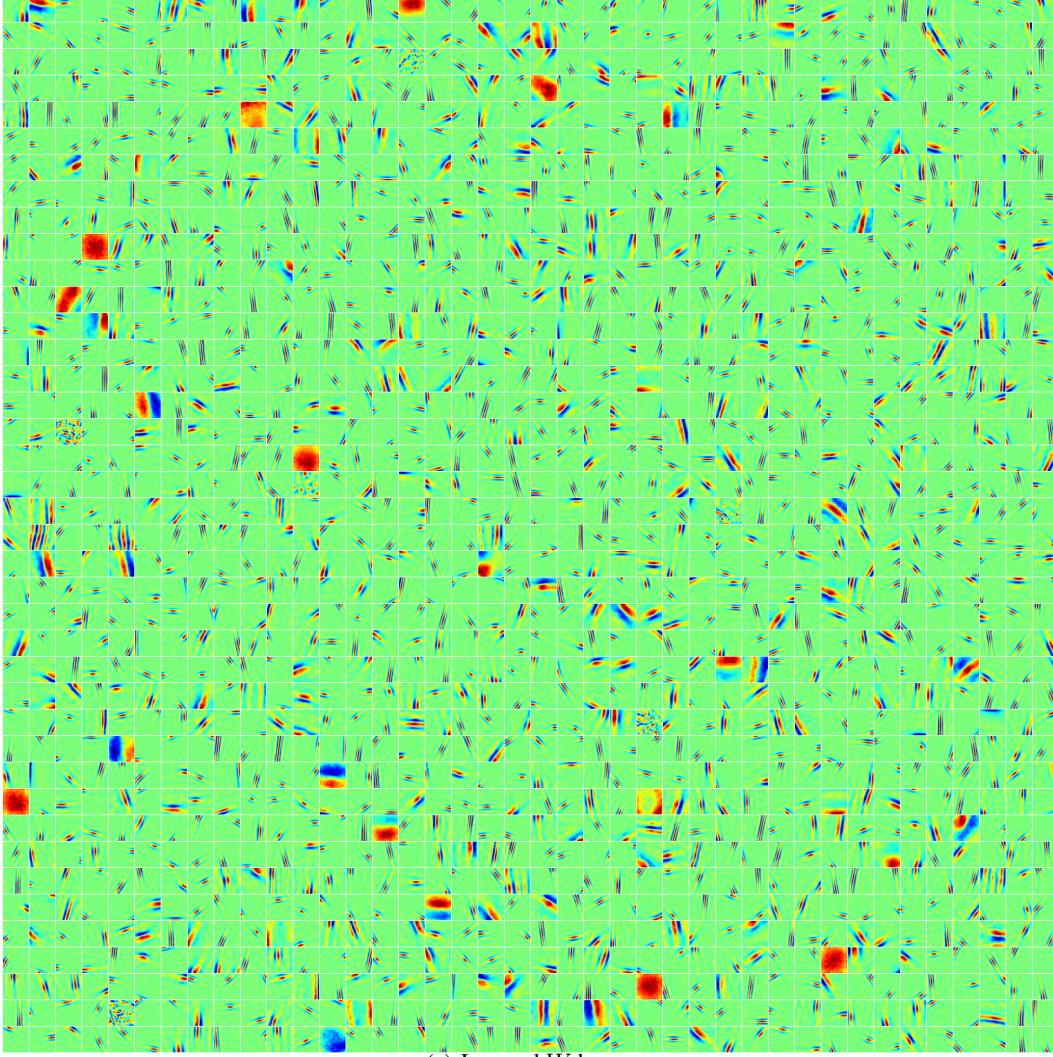

(a) Learned  $W$  bases.

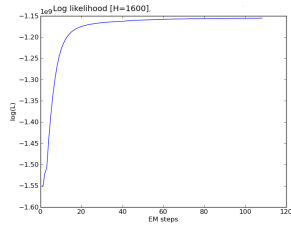

(b) Log-likelihood

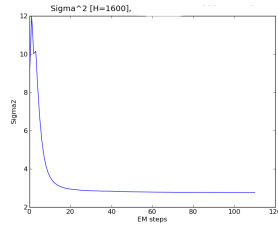

(c) Learned  $\sigma^2$ .

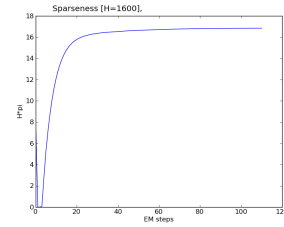

(d) Learned  $\pi H'$ .

Figure 1: Results for BSC<sup>s+s</sup> when running on  $N = 500,000$  image patches of size  $D = 40 \times 40 = 1600$ . The number of hidden variables was set to  $H = 1600$  and  $H'$  was set to 36. All other parameters were set as described in 4. (a) shows the learned basis functions  $\tilde{W}_h$ , (b) shows the approximated log-likelihood throughout 100 EM steps and corresponding learned data noise (c) and sparsity (d).

## B BSC<sup>s+s</sup> on $32 \times 32$ Image patches

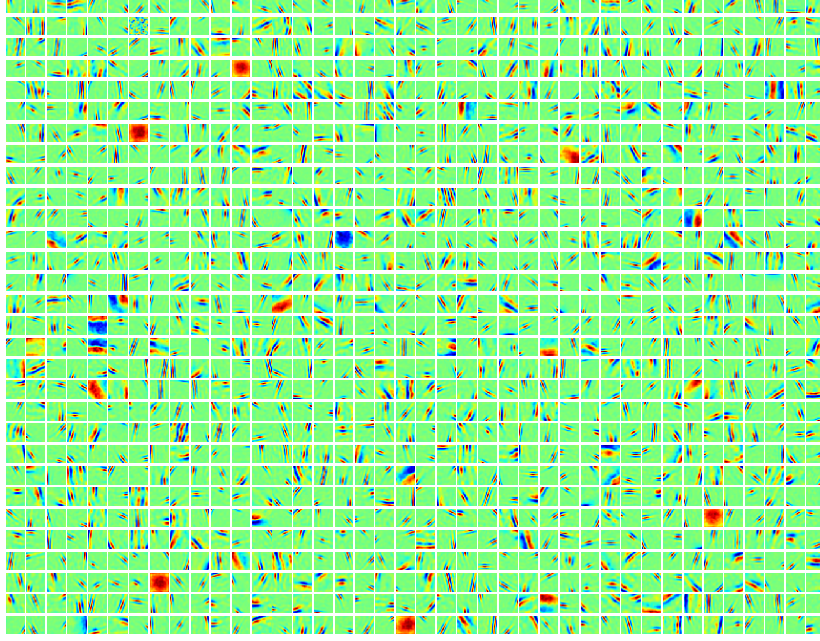

(a) Learned  $W$  bases.

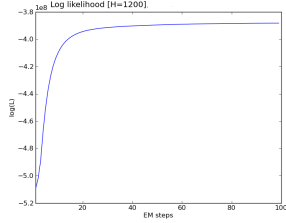

(b) Log-likelihood

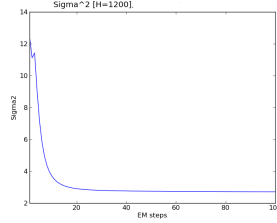

(c) Learned  $\sigma^2$ .

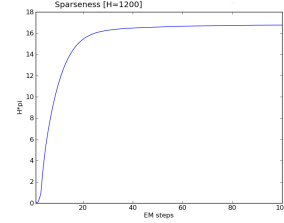

(d) Learned  $\pi H'$ .

Figure 2: Results for BSC<sup>s+s</sup> when running on  $N = 200,000$  image patches of size  $D = 32 \times 32 = 1024$ . The number of hidden variables was set to  $H = 1200$  and  $H'$  was set to 26. All other parameters were set as described in 4. (a) shows the learned basis functions  $\vec{W}_h$ , (b) shows the approximated log-likelihood throughout 100 EM steps and and corresponding learned data noise (c) and sparsity (d).
